# Supplementary material for: A population genomic characterization of copy number variation in the opportunistic fungal pathogen Aspergillus fumigatus
Source: PubMed Central journal article supplement (PMC6072042; doi:10.1371/journal.pone.0201611), 2018-08-02

# S1 Figure

LMB-854 F18027

0.01

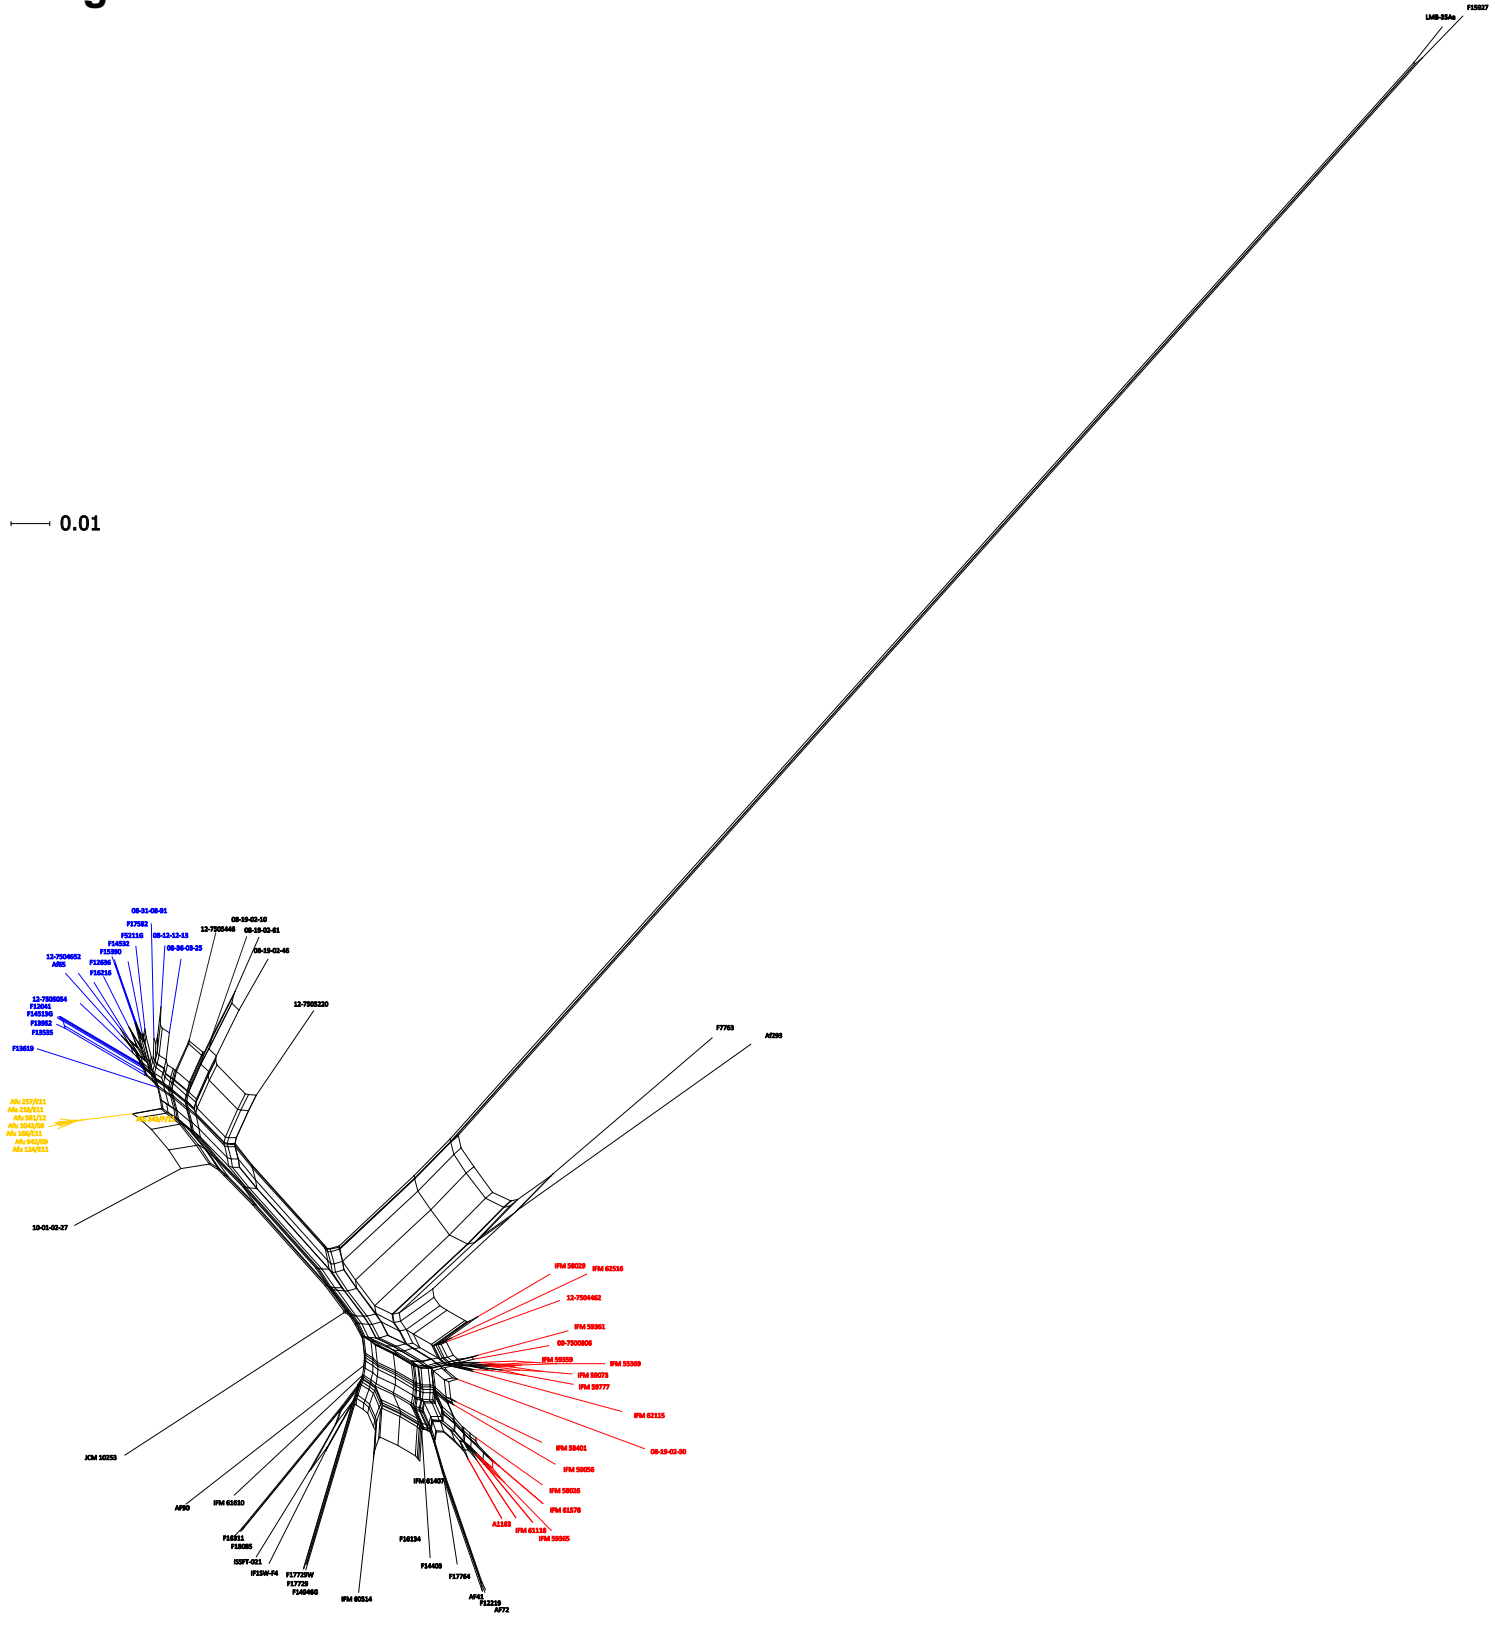

Supplement: pone.0201611.s001.pdf [file pone.0201611.s001.pdf]
